1 **Functional role of lanthanides in enzymatic activity and transcriptional**  
2 **regulation of PQQ-dependent alcohol dehydrogenases in *Pseudomonas putida***  
3 **KT2440**

4  
5 Matthias Wehrmann<sup>a</sup>, Patrick Billard<sup>b,c</sup>, Audrey Martin Meriadec<sup>b,c</sup>, Asfaw Zegeye<sup>b,c</sup>, Janosch  
6 Klebensberger<sup>a</sup>#

7  
8 *University of Stuttgart, Institute of Technical Biochemistry, Stuttgart, Germany<sup>a</sup>; Université de*  
9 *Lorraine, LIEC UMR7360, Faculté des Sciences et Technologies, Vandoeuvre-lès-Nancy, France<sup>b</sup>;*  
10 *CNRS, LIEC UMR7360, Faculté des Sciences et Technologies, Vandoeuvre-lès-Nancy, France<sup>c</sup>*

11  
12 Running title: Functional role of lanthanides in *Pseudomonas putida*

13  
14 #Address correspondence to Janosch Klebensberger, [janosch.klebensberger@itb.uni-](mailto:janosch.klebensberger@itb.uni-stuttgart.de)  
15 [stuttgart.de](mailto:janosch.klebensberger@itb.uni-stuttgart.de)

16  
17 Keywords: lanthanides, *Pseudomonas putida*, PQQ, volatiles, protein function, alcohol  
18 dehydrogenase, functional redundancy, gene regulation

19 **ABSTRACT**

20 The oxidation of alcohols and aldehydes is crucial for detoxification and efficient catabolism of  
21 various volatile organic compounds (VOCs). Thus, many Gram-negative bacteria have evolved  
22 periplasmic oxidation systems, based on pyrroloquinoline quinone-dependent alcohol  
23 dehydrogenases (PQQ-ADHs), which are often functionally redundant. Using purified enzymes  
24 from the soil-dwelling model organism *Pseudomonas putida* KT2440, the present study reports  
25 the first description and characterization of a lanthanide-dependent PQQ-ADH (PedH) in a non-  
26 methylotrophic bacterium. PedH exhibits enzyme activity on a similar substrate range as its  
27 Ca<sup>2+</sup>-dependent counterpart PedE, including linear and aromatic primary and secondary  
28 alcohols as well as aldehydes, however, only in the presence of lanthanide ions including La<sup>3+</sup>,  
29 Ce<sup>3+</sup>, Pr<sup>3+</sup>, Sm<sup>3+</sup> or Nd<sup>3+</sup>. Reporter assays revealed that PedH not only has a catalytic function,  
30 but is also involved in the transcriptional regulation of *pedE* and *pedH*, most likely acting as a  
31 sensory module. Notably, the underlying regulatory network is responsive to as little as 1 – 10  
32 nM of lanthanum, a concentration assumed to be of ecological relevance. The present study  
33 further demonstrates that the PQQ-dependent oxidation system is crucial for efficient growth  
34 with a variety of volatile alcohols. From these results we conclude that functional redundancy  
35 and inverse regulation of PedE and PedH represents an adaptive strategy of *P. putida* KT2440 to  
36 optimize growth with volatile alcohols in response to different lanthanide availability.

## 37 **IMPORTANCE**

38 Due to their low bioavailability, lanthanides have long been considered as biologically inert. In  
39 recent years however, the identification of lanthanides as a cofactor in methylotrophic bacteria  
40 has attracted tremendous interest among various biological fields. The present study reveals  
41 that one of the two PQQ-ADHs produced by the model organism *P. putida* KT2440 also utilizes  
42 lanthanides as a cofactor, thus expanding the scope of lanthanide employing bacteria beyond  
43 the methylotrophs. Similar to methylotrophic bacteria, a complex regulatory network is  
44 involved in the lanthanide-responsive switch between the two PQQ-ADHs encoded by *P. putida*  
45 KT2440. We further show that functional production of at least one of the enzymes is crucial for  
46 efficient growth with several volatile alcohols. Overall, our study provides a novel understanding  
47 for the redundancy of PQQ-ADHs observed in many organisms and further highlights the  
48 importance of lanthanides for bacterial metabolism, particularly in soil environments.

## 49 INTRODUCTION

50 As a soil-dwelling organism, *Pseudomonas putida* can encounter a large diversity of volatile  
51 organic compounds (VOCs) from different sources (1–3). The ecological role of many VOCs is not  
52 clearly defined but the number of known specific functions is rapidly increasing. These functions  
53 include the growth promotion of plants, anti-herbivore, -bacterial, and -fungal activities, and  
54 signaling both within the same and between different species (4–7). Among many other  
55 chemicals, VOCs include cyclic, acyclic, aromatic, and terpenoid structures with alcohol and  
56 aldehyde moieties, which are mainly derived from the metabolism of bacterial, yeast, fungal, or  
57 plant species. Beside their specific molecular function, they can also serve as carbon and energy  
58 sources for a wide range of microorganisms. To efficiently use volatile alcohols and aldehydes, it  
59 is advantageous if their metabolism is initiated by pyrroloquinoline quinone (PQQ)-dependent  
60 alcohol dehydrogenases (PQQ-ADHs) for at least two different reasons. Firstly, by using a  
61 periplasmic oxidation system, the organism is able to rapidly detoxify the often harmful  
62 chemicals without prior transport into the cytoplasm (8, 9). Secondly, the periplasmic location  
63 of the enzymes allows the rapid capture of a volatile carbon source by the conversion to and  
64 accumulation of acidic products with decreased volatility.

65 The reaction mechanism of PQQ-ADHs is still not completely resolved, but most likely proceeds  
66 *via* an ion-assisted direct hydride transfer from the substrate to the C5 of the non-covalently  
67 bound cofactor PQQ (10–12). PQQ-ADHs can be divided into different subclasses depending  
68 either on their molecular composition (quinoproteins or quinohemoproteins), or whether they  
69 are membrane bound or freely soluble within the periplasm (13). Many organisms express  
70 different classes or even multiple PQQ-ADHs of the same type, indicating the importance of

71 these enzymes (14–16). The genome of *P. putida* KT2440 encodes two PQQ-ADHs, namely  
72 PP\_2674 (*pedE*) and PP\_2679 (*pedH*), which have been shown to be involved in the metabolism  
73 of different substrates (17–19). PedE is a homolog of ExaA (QEDH) from *Pseudomonas*  
74 *aeruginosa*, which represents the most intensively studied member of the class of soluble  
75 ethanol dehydrogenases (20–24). ExaA and homologs thereof accept a wide variety of  
76 substrates and rely on a Ca<sup>2+</sup> ion in the active site, in addition to the PQQ cofactor, for the  
77 oxidation of primary and secondary alcohols, as well as aldehydes (18, 24). Despite their broad  
78 substrate range, ExaA-like enzymes show only very poor conversion of methanol. Not  
79 surprisingly, methano- and methylotrophic bacteria, which can use methane and methanol as a  
80 source of carbon and energy, encode a different type of PQQ-dependent enzyme, the MxaF-  
81 type of methanol dehydrogenases (MxaF-MDH) (25, 26). These enzymes display high substrate  
82 specificity for methanol and formaldehyde and also depend on a Ca<sup>2+</sup> as cofactor (27).  
83 Interestingly, methano- and methylotrophic bacteria encode an additional type of PQQ-  
84 dependent methanol dehydrogenases, the XoxF-MDH type, which utilizes rare earth metals  
85 (REM) of the lanthanide series as cofactor instead of calcium (28–30).

86 Since their discovery, several XoxF-type MDHs from different methano- and methylotrophs have  
87 been identified and characterized (31–33). Phylogenetic analysis of available sequence  
88 information suggests that lanthanide dependency is an ancestral feature of PQQ-ADHs, and that  
89 these enzymes are more abundant than their Ca<sup>2+</sup>-dependent counterparts (15, 34). In addition,  
90 a very recent publication described the first lanthanide-dependent ethanol dehydrogenase in *M.*  
91 *extorquens* AM1 (16). As a consequence, REM-dependent enzymes and the microorganisms  
92 which produce them have sparked a lot of academic and commercial interest, as they might be

93 exploited in a broad variety of biotechnological fields (35, 36). Potential applications range from  
94 the development of new biocatalysts and biosensors to the use of the associated  
95 microorganisms in biomining, bioleaching, and recycling processes for REMs. However, so far  
96 lanthanide-dependent PQQ-ADHs have been limited to methano- and methylotrophic bacteria.

97 In the present study, we report the first description and detailed characterization of a  
98 lanthanide-dependent PQQ-ADH (PedH) in the non-methylotrophic bacterium *Pseudomonas*  
99 *putida* KT2440, which represents a model organism for industrial and environmental  
100 applications (37–40). We demonstrate that PedH exhibits enzymatic activity only in the  
101 presence of lanthanides, including but not limited to lanthanum, praseodymium and cerium,  
102 and show that this enzyme has a similar substrate range as PedE, the recently characterized  
103 Ca<sup>2+</sup>-dependent PQQ-ADH from KT2440 (18). By the use of deletion mutants and transcriptional  
104 reporter fusions, we provide evidence that the functional redundancy of the PQQ-ADHs reflects  
105 the variable availability of lanthanides in the natural environment of *P. putida* KT2440 and show  
106 that these enzymes are crucial for efficient growth with a variety of volatile alcohols. Finally, we  
107 reveal that PedH plays an important role in the regulatory switch between *pedH* and *pedE*  
108 transcription, most likely acting as a sensory module. From these data, we conclude that KT2440  
109 responds to lanthanide availability with the inverse transcriptional regulation of the two PQQ-  
110 ADHs to optimize growth with volatile alcoholic and aldehyde substrates.

## 111 RESULTS

112 **Biochemical characterization of PedE and PedH.** Like many other organisms, *Pseudomonas*  
113 *putida* KT2440 harbors more than one gene annotated as a PQQ-ADH, namely PP\_2674  
114 (PedE/QedH; GI: 26989393) and PP\_2679 (PedH; GI: 26989398). To study the rationale for this  
115 redundancy, we purified and characterized the corresponding enzymes. A one-step affinity  
116 chromatography method produced soluble C-terminally His-tagged PedE and PedH to visible  
117 purity (**Fig. S1**) from cell lysates of *E. coli* BL21 (DE3). Under optimized reaction conditions,  
118 which include the presence of 1 mM Ca<sup>2+</sup>, the specific activities of purified PedE with a variety of  
119 substrates were determined (**Table 1**). For all linear primary alcohols and aldehydes,  
120 comparably high enzyme activities ranging from 1.9 ± 0.2 U mg<sup>-1</sup> to 6.7 ± 0.9 U mg<sup>-1</sup> were found.  
121 Similarly, 2-phenylethanol, the secondary alcohol 2-butanol, cinnamyl alcohol, and the acyclic  
122 sesquiterpene farnesol were efficiently converted with specific activities ranging from 6.7 ± 1.1  
123 U mg<sup>-1</sup> to 2.0 ± 0.3 U mg<sup>-1</sup>. Methanol, 2,3-butanediol, and ethanolamine were poor substrates  
124 for the enzyme with about 10-fold decrease in specific activity compared to ethanol or 2-  
125 phenylethanol. From all substrates tested, cinnamyl aldehyde was the only compound with  
126 which no activity was detected for PedE.

127 When we assayed purified PedH under the optimized reaction conditions used for PedE, no  
128 activity for any of the tested substrates was observed (data not shown). Comparison of the  
129 active sites of both enzymes, using homology models based on the crystal structure of the  
130 ethanol dehydrogenase ExaA of *P. aeruginosa* (PDB: 1FLG) revealed that, similar to other  
131 characterized representatives of the PQQ-dependent ethanol dehydrogenase type, the PedE  
132 protein harbors a serine residue at amino acid position 295, which is involved in the

133 coordination of the  $\text{Ca}^{2+}$  ion (**Fig. 1A**). In contrast, in PedH this residue is exchanged to an  
134 aspartate (**Fig. 1B**). As this aspartate residue has recently been associated with the coordination  
135 of trivalent lanthanide ions in the active site of PQQ-dependent methanol and ethanol  
136 dehydrogenases in methylotrophs (15, 16), we tested PedH for activity with ethanol in the  
137 presence of a variety of rare earth metals (**Fig. 2**). From these experiments we found that PedH  
138 showed no activity when 1  $\mu\text{M}$  of  $\text{Er}^{3+}$ ,  $\text{Sc}^{3+}$ ,  $\text{Y}^{3+}$  or  $\text{Yb}^{3+}$  was added to the reaction mixture.  
139 However, in the presence of 1  $\mu\text{M}$  of the lanthanides  $\text{La}^{3+}$ ,  $\text{Ce}^{3+}$ ,  $\text{Pr}^{3+}$ ,  $\text{Nd}^{3+}$ ,  $\text{Sm}^{3+}$ ,  $\text{Gd}^{3+}$  or  $\text{Tb}^{3+}$   
140 enzymatic activities were detected, with maximal specific activities observed with  $\text{Pr}^{3+}$  and  $\text{Nd}^{3+}$ ,  
141 and only very low activities with  $\text{Gd}^{3+}$  or  $\text{Tb}^{3+}$ .

142 Under optimized conditions, which include the supplementation with 1  $\mu\text{M}$   $\text{Pr}^{3+}$  instead of  $\text{Ca}^{2+}$ ,  
143 PedH showed a similar activity pattern as PedE (**Table 1**), but exhibited about 2-fold higher  
144 specific activities. Further, the functional concentration range of the cation cofactor differed  
145 dramatically for the two enzymes (**Fig. S2A**). While PedE showed enzyme activity at  
146 concentrations from 10  $\mu\text{M}$  to 10 mM  $\text{CaCl}_2$  with a peak in activity at 1 mM, PedH activity was  
147 found with lanthanide concentrations as little as 10 nM and up to 100  $\mu\text{M}$  with a peak in activity  
148 at 1  $\mu\text{M}$ . From these data we calculated the dissociation constants ( $K_D$ ) for various metals to the  
149 corresponding enzyme and found that PedH has an 850- to 2500-fold higher binding affinity for  
150 lanthanides ( $K_D = 25 - 75$  nM; **Fig. S2B2**) as PedE does for  $\text{Ca}^{2+}$  ( $K_D = 64$   $\mu\text{M}$ ; **Fig. S2B1**). The  
151 subsequent determination of kinetic parameters with ethanol showed that  $V_{max}$  of PedH was  
152 approximately 1.7-fold higher than that observed for PedE (10.6 U  $\text{mg}^{-1}$  vs. 6.1 U  $\text{mg}^{-1}$ ; **Fig. 3**).  
153 However, the corresponding  $K_M$  was 2-fold lower for PedE compared to PedH (85  $\mu\text{M}$  vs. 177  
154  $\mu\text{M}$ ). A similar pattern was found with acetaldehyde and 2-phenylethanol, but with



155 approximately 1.6-fold (2-phenylethanol) and 10–15-fold (acetaldehyde) lower catalytic  
156 efficiencies compared to those measured with ethanol. Statistical analysis (two-tailed  $t$ -test;  $\alpha =$   
157 0.05;  $N = 3$ ; GraphPad Prism, version 7.03) revealed that all maximal velocities ( $V_{max}$ ) and  
158 binding constants ( $K_M$ ) except for the  $K_M$  with ethanol were significantly different ( $P < 0.05$ )  
159 between PedE and PedH, however no significant differences could be observed in the catalytic  
160 efficiencies ( $k_{cat}/K_M$ ).

161 ***Growth with volatile alcohols in the presence and absence of lanthanides.*** In a next step,  
162 individual ( $\Delta pedE$ ,  $\Delta pedH$ ,  $\Delta pqq$ ) and combinatorial ( $\Delta pedE\Delta pedH$ ) deletion mutants were tested  
163 for growth with several VOCs using an agar plate assay in the presence and absence of 20  $\mu\text{M}$   
164 lanthanum (**Fig. 4A**). Strains KT2440 (type strain), KT2440\* ( $\Delta upp$  strain used as the parental  
165 strain for knockout mutants) and  $\Delta pedH$  grew efficiently with ethanol, 1-butanol, and 2-  
166 phenylethanol in the absence of  $\text{La}^{3+}$ . Strain  $\Delta pedE$  displayed no growth under this condition.  
167 Even more interestingly, the addition of 20  $\mu\text{M}$  of  $\text{La}^{3+}$  to the agar medium not only resulted in  
168 growth of the  $\Delta pedE$  strain, but also restricted the growth of  $\Delta pedH$ . The double mutant  
169  $\Delta pedE\Delta pedH$  and the  $\Delta pqq$  mutant, which is deficient in PQQ biosynthesis, showed no growth  
170 under both conditions. These experiments revealed that efficient growth with all tested  
171 alcohols, except the microbial fermentation product 2,3-butanediol, was dependent on the  
172 functional expression of PedE or PedH.

173 To validate these findings, growth experiments in liquid M9 medium with 2-phenylethanol as  
174 sole carbon and energy source in the presence and absence of 20  $\mu\text{M}$   $\text{La}^{3+}$  were performed (**Fig.**  
175 **4B1-4**). For this, plastic Erlenmeyer flasks were used to avoid potential contaminations of rare  
176 earth metals (REM) from the glassware (33). Growth of the liquid cultures followed a similar

177 pattern to that observed in the agar plate assay. While strain KT2440\* (**Fig. 4B1**) showed growth  
178 after an 18–20 h lag phase and a peak in optical density at about 35 h in both conditions, the  
179 absence and the presence of lanthanum, strain  $\Delta pedE\Delta pedH$  (**Fig. 4B4**) did not display growth in  
180 either condition. Growth of  $\Delta pedE$  (**Fig. 4B3**) was observed exclusively in the presence of  
181 lanthanum. Lastly, strain  $\Delta pedH$  (**Fig. 4B2**) showed growth similar to that of the KT2440\*  
182 wildtype in the absence of lanthanum, but no growth was detected when 20  $\mu\text{M}$   $\text{La}^{3+}$  were  
183 supplemented.

184 **Transcriptional regulation of *pedE* and *pedH* determines growth with alcoholic volatiles.** The  
185 previous experiments proved that for efficient growth with various VOCs the functional  
186 expression of at least one of the PQQ-ADHs is essential. The growth inhibition of the  $\Delta pedH$   
187 strain in the presence of lanthanum indicated a potential repression of the *pedE* gene in the  
188 presence of lanthanides, similar to recent reports in different methylotrophic bacteria (41–43).  
189 To proof this hypothesis, we constructed two reporter strains suitable for probing *pedE* and  
190 *pedH* promoter activities in KT2440\*. When these strains were tested with 1 mM of 2-  
191 phenylethanol in M9 medium (**Fig. 5A**), the addition of up to 10 nM  $\text{La}^{3+}$  did not affect *pedE*  
192 promoter activity compared to the condition in the absence of lanthanum. In contrast, the  
193 presence of 100 nM – 100  $\mu\text{M}$  of  $\text{La}^{3+}$  resulted in reduced *pedE* promoter activity. An inverse  
194 pattern was found for the *pedH* promoter. Here, very low activities were detected in the  
195 presence of up to 10 nM  $\text{La}^{3+}$ . Upon addition of 100 nM or more lanthanum, expression from  
196 *pedE* promoter was induced with a peak at 10  $\mu\text{M}$ .

197 The importance of transcriptional regulation of *pedE* and *pedH* was further tested by growth  
198 experiments with 2-phenylethanol in liquid M9 medium (**Fig. 5B**). Growth of KT2440\* was not

199 affected by the addition of up to 100  $\mu\text{M}$  of lanthanum. On the other hand, strain  $\Delta pedH$   
200 showed a linear decrease in growth in the presence of increasing  $\text{La}^{3+}$  concentrations up to 1  
201  $\mu\text{M}$ , and no measurable growth when 10  $\mu\text{M}$  or more  $\text{La}^{3+}$  was present in the medium. In  
202 contrast, growth of strain  $\Delta pedE$  was only observed in the presence of 10  $\mu\text{M}$  or more  $\text{La}^{3+}$ .  
203 Strain  $\Delta pedE\Delta pedH$  did not grow under any of the tested conditions. A similar correlation  
204 between growth and promoter activity of  $pedE$  and  $pedH$  was observed for  $\text{Ce}^{3+}$ ,  $\text{Pr}^{3+}$ ,  $\text{Nd}^{3+}$ , and  
205  $\text{Sm}^{3+}$  (**Fig. S3**).

206 These results demonstrate that KT2440 inversely regulates  $pedE$  and  $pedH$  promoter activity in  
207 response to varying lanthanide concentrations and suggests that this regulation represents the  
208 primary determinant for growth. However, in comparison to earlier studies with *M. extorquens*  
209 AM1, the effective lanthanide concentration needed for growth was much higher (10  $\mu\text{M}$  vs. 5  
210 nM)(41). As lanthanides are known to form very poorly soluble complexes with phosphate and  
211 hydroxide ions, we wondered whether this difference was caused by the minimal medium used  
212 for growth (MP vs. M9). When the experiments were repeated with MP medium, the same  
213 general trend and correlation of promoter activity and growth was found as described for M9  
214 medium (**Fig. 6AB**). However, one difference was that the effective lanthanum concentration to  
215 trigger a transcriptional response and growth was considerably lower (1 nM and 10 nM).  
216 Another difference was that at a concentration of 10 nM  $\text{La}^{3+}$  minimal growth of both single  
217 mutant strains was observed. The latter observation indicated that environmental conditions  
218 might exist in which PedE and PedH are both functionally produced. To further test this  
219 hypothesis, an additional growth experiment was performed and indeed showed growth of

220 both single mutants in a concentration range of 1 – 15 nM La<sup>3+</sup> after prolonged (48 h) incubation  
221 (Fig. S9).

222 **Impact of *PedE* and *PedH* on transcriptional regulation.** In *M. extorquens* AM1, the  
223 transcription of methanol dehydrogenases is regulated, at least partially, by the PQQ-dependent  
224 enzymes themselves (44). To test whether a similar outside-in signaling is also present in *P.*  
225 *putida* KT2440, expression from the *pedE* and *pedH* promoter were quantified during growth  
226 with 2-phenylethanol in MP medium (Fig. 7). In the absence of lanthanum, the  $\Delta pedH$  strain  
227 showed a 4-fold induction of *pedE* promoter activity, whereas the  $\Delta pedE$  strain exhibited a slight  
228 decrease (0.5-fold) in expression from the *pedE* promoter compared to KT2440\* (Fig. 7A). The  
229 presence of 10 nM La<sup>3+</sup> resulted in a strong reduction of *pedE* promoter activity in all strains (21-  
230 fold for KT2440\*, 6-fold for  $\Delta pedE$ , 127-fold for  $\Delta pedH$ ) compared to the control without  
231 lanthanum. In comparison to *pedE*, expression from the *pedH* promoter was considerably lower  
232 for all strains in the absence of lanthanum (Fig. 7B). However, when lanthanum was present, a  
233 strong induction of *pedH* promoter activity in strain KT2440\* (37-fold) and  $\Delta pedE$  (29-fold) was  
234 detected. Notably, the expression from the *pedH* promoter was dramatically reduced (2-fold vs.  
235 37-fold) in the  $\Delta pedH$  strain in comparison to the strains capable of producing a functional PedH  
236 protein.

## 237 DISCUSSION

238 Lanthanide-dependent enzymes have so far been found exclusively within methylotrophic  
239 organisms (16, 28–30, 32, 33). Using purified enzymes, we uncover that PedH, one of the two  
240 PQQ-dependent ADHs (PQQ-ADHs) produced by the non-methylotrophic model organism *P.*  
241 *putida* KT2440, is also a lanthanide-dependent enzyme, which utilizes La<sup>3+</sup>, Ce<sup>3+</sup>, Pr<sup>3+</sup>, Nd<sup>3+</sup>, Sm<sup>3+</sup>,  
242 Gd<sup>3+</sup> and Tb<sup>3+</sup> as metal cofactor. The highest catalytic rates were observed with Pr<sup>3+</sup> and Nd<sup>3+</sup>.  
243 Notably, with lanthanides of higher atomic masses than Nd<sup>3+</sup> the specific activity decreased  
244 gradually, eventually resulting in no detectable activity with the heaviest lanthanides tested  
245 (Er<sup>3+</sup> and Yb<sup>3+</sup>). An analogous effect was previously reported by Pol *et al.*, who investigated the  
246 impact of different lanthanides on growth rates of *Methylacidiphilum fumariolicum* SolV (33). A  
247 possible explanation for these observations is that the decreased atomic radius, which is a  
248 consequence of the lanthanide contraction, limits the more heavy lanthanides from being  
249 functionally incorporated into the active site of PedH (45).

250 Kinetic parameters determined with Pr<sup>3+</sup> and the three model substrates ethanol, acetaldehyde  
251 and 2-phenylethanol revealed that  $V_{max}$  of PedH is about twofold higher compared to its Ca<sup>2+</sup>-  
252 dependent counterpart PedE. It has been proposed that the increased activity can be explained  
253 by the higher Lewis acidity of the lanthanides in comparison to calcium (46). Interestingly, we  
254 found that the  $K_M$  values of the lanthanide-dependent enzyme PedH with acetaldehyde or 2-  
255 phenylethanol are significantly smaller than those of the Ca<sup>2+</sup>-dependent protein PedE. One  
256 possible explanation for this result is the higher polarity that arises in the active pocket of the  
257 trivalent cation coordinating PedH compared to the divalent cation coordinating PedE. Another  
258 explanation could be a smaller catalytic pocket, due to the higher atomic radius of Pr<sup>3+</sup>

259 compared to  $\text{Ca}^{2+}$ . The latter argument was proposed in an earlier study with the *mxoF*-type  
260 MDH of *M. extorquens* AM1 as a reason for decreased activities when  $\text{Ca}^{2+}$  was replaced with  
261  $\text{Ba}^{2+}$  (47). In any case, apart from the approximately 2-fold increased specific activity of PedH  
262 compared to PedE, the substrate scope and catalytic efficiencies ( $k_{cat}/K_M$ ) of both enzymes were  
263 found to be similar, which suggests that both enzymes are functionally redundant and only  
264 differ in their cofactor dependency.

265 Functional redundancy is a well-known mechanism to improve robustness in complex systems  
266 (48). The fact that many organisms express multiple PQQ-ADHs can be interpreted as an  
267 adaptation to maintain an important function under variable environmental conditions or in  
268 different microhabitats. Our study is supportive of such a hypothesis, as we demonstrate that  
269 under conditions of high lanthanide availability, efficient growth of cells with various naturally  
270 occurring alcoholic VOCs relies on the functional production of the lanthanide-dependent ADH  
271 PedH. Similarly, for growth in the absence of lanthanides, functional production of the calcium-  
272 dependent ADH PedE is mandatory. In this context it is important to note that growth in the  
273 agar plate assay used in this study is restrictive, as it depends on diffusion and evaporation of  
274 the volatile substrates. Thus, the assay most likely cannot discriminate between substrates for  
275 which PedE or PedH function are essential and substrates for which other but less efficient  
276 catabolic routes exist. We found that growth on ethanol (unpublished data) and 1-butanol (19),  
277 but not 2-phenylethanol (current study) is possible, but less efficient for a strain lacking PedE  
278 and PedH. From our and published data from a previous study (49), we therefore conclude that  
279 beside the fact that PedE and PedH is not essential for growth with short chain aliphatic alcohols

280 (C2 to C5), both enzymes provide rapid conversion of these substrates, which is crucial for  
281 efficient growth under restrictive conditions.

282 We further show that growth phenotypes strongly correlate with inverse transcriptional  
283 regulation of *pedE* and *pedH*. Similar results have been reported for several methylotrophic  
284 bacteria (41, 42). When cells of *P. putida* KT2440 were grown in liquid MP medium, the addition  
285 of as little as 10 nM of lanthanides was sufficient to trigger *pedE* repression and a strong (20-  
286 fold) concomitant induction of *pedH*. The transcription of *pedH* was found to be strongly  
287 influenced by the PedH protein itself, implying a role for PedH as a lanthanide sensory module.  
288 In *M. extorquens* AM1 the transcription of the calcium-dependent methanol dehydrogenase  
289 *mxoF* strictly relies on the presence of XoxF proteins (41, 44). Our data demonstrate that this  
290 regulation is different in *P. putida*, as *pedE* is only partially repressed by PedH. The fact that  
291 *pedE* repression in the presence of lanthanum is still observed in the  $\Delta pedH$  mutant strain,  
292 together with the notion that the induction of *pedH* is not fully mediated by PedH, strongly  
293 suggests the existence of at least one additional lanthanum-responsive regulatory module.  
294 Notably, a very recent study identified that the transmembrane associated sensory histidine  
295 kinase MxaY mediates the lanthanide-responsive switch of the PQQ-dependent MDHs in  
296 *Methylomicrobium buryatense* (43). In *P. putida* KT2440 three different membrane associated  
297 sensory histidine kinases, PedS1 (PP\_2664), PedS2 (PP\_2671) and PP\_2683, are encoded within  
298 close proximity of *pedE* and *pedH* as part of the predicted ErbR (AgmR) regulon (17). Whether  
299 one of these sensor kinases serves a similar function as MxaY needs to be determined in future  
300 studies.

301 From an ecological point of view, it is interesting that growth and inverse regulation occur even  
302 in presence of high  $\text{Ca}^{2+}$  concentrations (100  $\mu\text{M}$ ) when only nanomoles of lanthanum are  
303 supplied. From these data we conclude, similar to previous studies with *M. buryatense* or *M.*  
304 *extorquens* (32, 41), that the lanthanide-dependent enzyme PedH is the preferred PQQ-ADH  
305 when both metal cofactors are simultaneously accessible. Nevertheless, it was also  
306 demonstrated that under certain low REM concentrations, specific conditions exist in which  
307 both single mutants can grow. This suggests that the inverse regulation of the two enzymes is  
308 not a strict *on-off* switch, but rather operates by strongly shifting the transcription in favor of  
309 one of the enzymes depending on the REM concentration.

310 REM utilizing PQQ-ADHs have been suggested to be ancestral and more widespread than their  
311 calcium-dependent homologues (15, 50). This might indicate that calcium-dependent enzymes  
312 have evolved to colonize different and/or additional environmental niches in which lanthanide  
313 availability is less pronounced. Compared to soil environments, especially the rhizosphere,  
314 lanthanide concentrations in the phyllosphere and endosphere, as well as in other non-plant  
315 higher organisms are comparably low (51–54). It is thus tempting to speculate, that  $\text{Ca}^{2+}$ -  
316 dependent enzymes are of particular relevance for interactions with multicellular organisms  
317 outside of soil environments.

318 Metabolic interdependencies have been proposed as driving force for species co-occurrence  
319 and the emergence of mutualism in diverse microbial communities impacting their robustness,  
320 structure, and function (55–57). This is of particular interest in the context of periplasmic PQQ-  
321 ADHs, as organic alcohols and the corresponding oxidation products are not only crucial  
322 intermediates of the global carbon cycle, but can also exhibit additional functions including



323 signaling and growth inhibition (4–7, 58). A recent study reported that regulation of the MxaF-  
324 and XoxF-type MDHs in a methanotrophic bacterium can be influenced by the presence of a  
325 non-methanotrophic methylotroph in co-culture experiments (59). The authors nicely  
326 demonstrate that during co-cultivation in the presence of methane and lanthanides, the  
327 methanotrophic bacterium shifts its gene expression from the *xoxF*- to the *mxαF*-type MDH. As  
328 a result of this change, leakage of methanol from the methanotroph was observed, which  
329 subsequently served as growth substrate for the non-methanotrophic partner. Although the  
330 mechanism of this phenomenon is not yet resolved, it indicates that different types of PQQ-  
331 ADHs might not only be important for potential interactions with higher organisms as discussed  
332 above, but also within microbial communities. Based on our data, one can speculate that similar  
333 interactions are not limited to methano- and methylotrophic bacteria, but are relevant in a  
334 much broader ecological context.

335 Lastly, the discovery of lanthanides as a cofactor in biotechnological important organisms other  
336 than methylotrophic bacteria expands the possible applications one can envision for biomining,  
337 bioleaching, and recycling processes of rare earth metals (60–65). As such, we believe that  
338 future research about lanthanide-utilizing enzymes and organisms will improve our  
339 understanding of natural and synthetic microbial communities and could provide a basis for  
340 novel biotechnological tools and processes.

## 341 MATERIAL AND METHODS

342 **Bacterial strains, plasmids, and culture conditions.** Strains and plasmids used in this study  
343 (**Table S1**) as well as a detailed description of their construction (**Text S1**) can be found as  
344 supplementary material. Unless otherwise noted, *Pseudomonas putida* KT2440 and *Escherichia*  
345 *coli* strains were maintained on solidified (1.5% agar [w/v]) Lysogeny Broth (LB, Maniatis *et al.*,  
346 1982). Strains were routinely cultured in liquid LB medium, a modified M9 salt medium  
347 containing 74 mM phosphate buffer (pH 7), 18.6 mM NH<sub>4</sub>Cl, 8.6 mM NaCl, 2 mM MgSO<sub>4</sub>, 100  
348 μM CaCl<sub>2</sub> with a trace element solution containing Na<sub>3</sub>-citrate 51 μM, ZnSO<sub>4</sub> 7 μM, MnCl<sub>2</sub> 5 μM,  
349 CuSO<sub>4</sub> 4 μM, FeSO<sub>4</sub> 36 μM, H<sub>3</sub>BO<sub>3</sub> 5 μM, NaMoO<sub>4</sub> 137 nM, NiCl<sub>2</sub> 84 nM or a modified MP  
350 medium (67) containing 100 μM CaCl<sub>2</sub> instead of 20 μM CaCl<sub>2</sub> supplemented with succinate or 2-  
351 phenylethanol as sole source of carbon and energy at 30°C with shaking. Where indicated, 40 μg  
352 mL<sup>-1</sup> kanamycin or 15 μg mL<sup>-1</sup> gentamycin for *E. coli* and 40 μg mL<sup>-1</sup> kanamycin, 20 μg mL<sup>-1</sup> 5-  
353 fluoro uracil or 30 μg mL<sup>-1</sup> gentamycin for *P. putida* strains was added to the medium for  
354 maintenance and selection, respectively.

355 **Growth experiments in liquid medium.** All liquid growth experiments were carried out using a  
356 modified M9 minimal salt medium or MP medium (see above) supplemented with 25 mM  
357 succinate or 5 mM 2-phenylethanol as carbon and energy source. To avoid potential lanthanide  
358 contaminations from glassware, all growth experiments were carried out in 125 mL  
359 polycarbonate vessels (Corning) or in polypropylene 96 well 2 ml deep well plates (Carl Roth). If  
360 not stated otherwise, precultures were grown in 5 ml minimal medium (15 mL Falcon tubes)  
361 supplemented with succinate at 30 °C and 180 rpm using a rotary shaker (HT Minitron, Infors).  
362 The next day, cultures were washed three times in fresh minimal medium without a carbon and

363 energy source and used to inoculate 1 ml (for 2 ml deep well plates) or 25 ml (for 125 ml  
364 polycarbonate vessels) of fresh medium to an initial optical density at 600 nm ( $OD_{600}$ ) of 0.01.  
365 Subsequently, cultures were supplemented with the carbon and energy source as well as  
366 varying concentrations of lanthanides and incubated at 30°C and 180 rpm (for 125 ml  
367 polycarbonate vessels) or 800 rpm (for 2 ml deep well plates). For experiments in 125 ml  
368 polycarbonate vessels, growth was monitored by measuring the  $OD_{600}$  at regular intervals using  
369 a photometer (BioPhotometer, Eppendorf). For experiments carried out in 2 ml deep well  
370 plates,  $OD_{600}$  was determined after 24 h or 48 h by measuring 200  $\mu$ L of cell culture transferred  
371 to a microtiter plate (Greiner bio-one) in a microplate reader (POLARstar Omega, BMG Labtech).  
372 All data are presented as the mean value of biological triplicates with error bars representing  
373 the corresponding standard deviation.

374 **Agar plates assay.** For growth on solidified medium (1.5% agar [w/v]) with different substrates,  
375 M9 medium plates without addition of a carbon source and trace element solution were freshly  
376 prepared with or without the addition of 20  $\mu$ M lanthanum chloride. Cell mass of the strains  
377 was obtained from LB agar plates, suspended in M9 medium without carbon and energy source,  
378 and adjusted to an optical density of 0.5. After drying the plates for 20 minutes in a laminar flow  
379 cabinet, 10  $\mu$ L of each cell suspension was dropped onto the same plate and distributed using  
380 an inoculation loop on about 1/6 of the plate's surface. When all strains were distributed, a 10  
381  $\mu$ L drop of a 1:1 mixture (v/v) of ethanol, 1-butanol, 2-3 butanediol, 1-octanol, or 2-  
382 phenylethanol in dimethyl sulfoxide (DMSO) was placed in the middle of the plate.  
383 Subsequently, the plates were sealed in plastic bags and incubated at room temperature. After  
384 48 h, growth was quantified with a digital imaging system (Vilber Lourmat, QUANTUM ST4)

385 using the standard fluorescence settings with combined white light and UV illumination (ex. 254  
386 nm) for 1 sec, an aperture of 11 and using the preinstalled F590 nm filter. All individual pictures  
387 were subsequently sized, isolated from the background, and corrected for sharpness (+ 50%),  
388 brightness (+ 20%), and contrast (+ 40%) using the graphic formatting function in Microsoft  
389 PowerPoint.

390 **Transcriptional reporter assays.** For transcriptional reporter assays, *P. putida* harboring either  
391 Tn7-based *pedE-lux* and *pedH-lux* transcriptional reporter fusion were grown overnight in a  
392 modified MP medium with succinate, washed three times in MP medium with no added carbon  
393 source and finally suspended in MP medium or M9 medium with 1 mM 2-phenylethanol to an  
394 OD<sub>600</sub> of 0.1. For luminescence measurements, 180 µl of cell suspension were added to 20 µl of  
395 tenfold concentrated metal salt solution in white 96-well plates with clear bottom (µClear,  
396 Greiner Bio-One). Microtiter plates were placed in a humid box to prevent evaporation,  
397 incubated at 30°C with continuous agitation (200 rpm) and light emission as well as OD<sub>600</sub> were  
398 recorded at regular intervals in a FLX-Xenius plate reader (SAFAS, Monaco) for up to 6 h. For  
399 both parameters, background provided by the MP medium was subtracted, and the  
400 luminescence was normalized to the corresponding OD<sub>600</sub>. Experiments were performed in  
401 biological triplicates and data are presented as the mean value with error bars representing the  
402 corresponding standard deviation.

403 **Enzymatic assays.** Details about the expression and purification procedure for PedE and PedH  
404 can be found as supplementary material (**Text S1**). Enzyme activities of purified PedE and PedH  
405 were measured using a dye-linked colorimetric assay in 96 well microtiter plates (Greiner bio-  
406 one) based on previous studies (24, 68). Under optimized conditions (**Fig. S4-S8**), one well

407 contained a total volume of 250  $\mu\text{L}$  of assay solution supplemented with: 100 mM Tris HCl pH 8;  
408 500  $\mu\text{M}$  PMS; 150  $\mu\text{M}$  2,6-dichlorophenol indophenol (DCPIP); 25 mM imidazole; 1 mM  $\text{CaCl}_2$  for  
409 PedE or 1  $\mu\text{M}$   $\text{PrCl}_3$  for PedH; 1  $\mu\text{M}$  PQQ for PedE or 50  $\mu\text{M}$  PQQ for PedH; 12.5  $\mu\text{L}$  substrate and  
410 2.5–20  $\mu\text{g}/\text{ml}$  enzyme. The reaction was started by addition of the substrate to the reaction  
411 mixture and the activity was calculated based on the change of  $\text{OD}_{600}$  within the first minute  
412 upon substrate addition. The molar extinction coefficient of DCPIP was experimentally  
413 determined to be  $24.1 \text{ cm}^{-1}\text{M}^{-1}$  at pH 8 (**Fig. S2**). Due to a substrate independent background  
414 activity, the assay solution without substrate was incubated for 45 minutes at  $30^\circ\text{C}$  prior to  
415 enzyme activity measurements. As activities were between 8- and 12-fold higher when using  
416 imidazole compared to ammonium chloride or ethylamine, imidazole was used in all  
417 experiments (**Fig. S3**). Negative control reactions, including the potential effect of BSA or assay  
418 mixture without the addition of enzyme, did not show any reduction of DCPIP under the  
419 conditions used (data not shown). All assays were performed in three replicates and data are  
420 presented as the mean value with error bars representing the corresponding standard  
421 deviation.

422 ***Metal dependency of the enzymes.*** To test the metal dependency of PedE and PedH, a similar  
423 set-up as described above was used omitting  $\text{CaCl}_2$  for PedE or  $\text{PrCl}_3$  for PedH in the assay  
424 solution. 1  $\mu\text{M}$  of different rare earth metals was added prior to incubation at  $30^\circ\text{C}$ . These  
425 included  $\text{LaCl}_3$ ,  $\text{CeCl}_3$ ,  $\text{PrCl}_3$ ,  $\text{NdCl}_3$ ,  $\text{SmCl}_3$ ,  $\text{GdCl}_3$ ,  $\text{ErCl}_3$ ,  $\text{YbCl}_3$ ,  $\text{ScCl}_3$  and  $\text{YCl}_3$ . Activities were  
426 determined in triplicates as described above.

427 ***Enzyme kinetics.*** The kinetic constants of the enzyme substrate combinations were determined  
428 using the enzyme assay described above with various substrate concentrations measured in

429 triplicates. The resulting activity constants were calculated by fitting the enzyme activities by  
430 nonlinear regression to the Michaelis-Menten equation using the 'Michaelis-Menten' least-  
431 square fit method with no constraints in GraphPad Prism (GraphPad Software, version 7.03).

432 **Homology models.** The PedE and PedH homology models were built with Swiss-Model (69). As  
433 ExaA has the highest sequence similarity with both PedE (60%) and PedH (49%) of all available  
434 crystal structures in the Swiss-Model template library, the crystal structure of the PQQ  
435 dependent ADH ExaA of *P. aeruginosa* (1FLG) was used as a template for model construction  
436 (23). Visualization of the models was carried out using PyMOL (70).

#### 437 **FUNDING INFORMATION**

438 The work of Matthias Wehrmann and Janosch Klebensberger was supported by an individual  
439 research grant from the Deutsche Forschungsgemeinschaft (KL 2340/2-1). The work of Patrick  
440 Billard, Audrey Martin Meriadec and Asfaw Zegeye was supported in part by Labex  
441 Ressources21 (ANR-10-LABX-21-01).

#### 442 **ACKNOWLEDGEMENTS**

443 The authors would like to thank Lena Stehle and Svenja Moors for their help in the  
444 establishment of the enzymatic assay. Prof. Altenbuchner, Dr. Nadja Graf, Dr. Joanna Goldberg  
445 and Prof. Herbert Schweizer are acknowledged for providing different strains and plasmids. We  
446 further would like to thank Prof. Thorsten Thomas and Dr. Brendan Colley for critical reading of  
447 the manuscript draft and Prof. Bernhard Hauer for his continuous support. The authors further  
448 declare that the research was conducted in the absence of any commercial or financial  
449 relationships that could be construed as a potential conflict of interest.

450 **REFERENCES**

- 451 1. **Insam H, Seewald MSA.** 2010. Volatile organic compounds (VOCs) in soils. *Biol Fertil Soils*  
452 **46**:199–213 doi:10.1007/s00374-010-0442-3.
- 453 2. **Penuelas J, Asensio D, Tholl D, Wenke K, Rosenkranz M, Piechulla B, Schnitzler JP.** 2014.  
454 Biogenic volatile emissions from the soil. *Plant Cell Environ* **37**:1866–1891  
455 doi:10.1111/pce.12340.
- 456 3. **van Dam NM, Weinhold A, Garbeva P.** 2016. Calling in the Dark: The Role of Volatiles for  
457 Communication in the Rhizosphere, p. 175–210. *In* Blande, JD, Glinwood, R (eds.),  
458 Deciphering Chemical Language of Plant Communication. Springer International  
459 Publishing, Cham doi:10.1007/978-3-319-33498-1\_8.
- 460 4. **Schmidt R, Cordovez V, de Boer W, Raaijmakers J, Garbeva P.** 2015. Volatile affairs in  
461 microbial interactions. *ISME J* **9**:2329–2335 doi:10.1038/ismej.2015.42.
- 462 5. **Jones SE, Elliot MA.** 2017. Streptomyces Exploration: Competition, Volatile  
463 Communication and New Bacterial Behaviours. *Trends Microbiol* **26**:3167–3170  
464 doi:10.1016/j.tim.2017.02.001.
- 465 6. **Tyc O, Song C, Dickschat JS, Vos M, Garbeva P.** 2016. The Ecological Role of Volatile and  
466 Soluble Secondary Metabolites Produced by Soil Bacteria. *Trends Microbiol* **26**:3167–  
467 3170 doi:10.1016/j.tim.2016.12.002.
- 468 7. **Bitas V, Kim H-S, Bennett JW, Kang S.** 2013. Sniffing on Microbes: Diverse Roles of  
469 Microbial Volatile Organic Compounds in Plant Health. *Mol Plant-Microbe Interact*

- 470           **26**:835–843 doi:10.1094/MPMI-10-12-0249-CR.
- 471    8.    **Adachi O, Ano Y, Toyama H, Matsushita K.** 2007. Biooxidation with PQQ- and FAD-  
472           Dependent Dehydrogenases, p. 1–41. *In* Modern Biooxidation. Wiley-VCH Verlag GmbH &  
473           Co. KGaA doi:10.1002/9783527611522.ch1.
- 474    9.    **Toyama H, Mathews FS, Adachi O, Matsushita K.** 2004. Quinohemoprotein alcohol  
475           dehydrogenases: structure, function, and physiology. *Arch Biochem Biophys* **428**:10–21  
476           doi:10.1016/j.abb.2004.03.037.
- 477    10.   **Anthony C, Ghosh M, Blake CCF.** 1994. The structure and function of methanol  
478           dehydrogenase and related quinoproteins containing pyrrolo-quinoline quinone. *Biochem*  
479           *J* **304**:665–674 doi:10.1042/bj3040665.
- 480    11.   **Oubrie A, Dijkstra BW.** 2000. Structural requirements of pyrroloquinoline quinone  
481           dependent enzymatic reactions. *Protein Sci* **9**:1265–1273 doi:10.1110/ps.9.7.1265.
- 482    12.   **Kay CWM, Mennenga B, Görisch H, Bittl R.** 2005. Substrate-Binding in Quinoprotein  
483           Ethanol Dehydrogenase from *Pseudomonas aeruginosa* Studied by Electron Paramagnetic  
484           Resonance at 94 GHz. *J Am Chem Soc* **127**:7974–7975 doi:10.1021/ja050972c.
- 485    13.   **Anthony C.** 2001. Pyrroloquinoline Quinone (PQQ) and Quinoprotein Enzymes. *Antioxid*  
486           *Redox Signal* **3**:757–774 doi:10.1089/15230860152664966.
- 487    14.   **Toyama H, Fujii A, Matsushita K, Shinagawa E, Ameyama M, Adachi O.** 1995. Three  
488           distinct quinoprotein alcohol dehydrogenases are expressed when *Pseudomonas putida*  
489           is grown on different alcohols. *J Bacteriol* **177**:2442–2450.



- 490 15. **Keltjens JT, Pol A, Reimann J, Op den Camp HJM.** 2014. PQQ-dependent methanol  
491 dehydrogenases: rare-earth elements make a difference. *Appl Microbiol Biotechnol*  
492 **98**:6163–83 doi:10.1007/s00253-014-5766-8.
- 493 16. **Good NM, Vu HN, Suriano CJ, Subuyuj GA, Skovran E, Martinez-Gomez NC.** 2016.  
494 Pyrroloquinoline Quinone Ethanol Dehydrogenase in *Methylobacterium extorquens* AM1  
495 Extends Lanthanide-Dependent Metabolism to Multicarbon Substrates. *J Bacteriol*  
496 **198**:3109–3118 doi:10.1128/JB.00478-16.
- 497 17. **Mükschel B, Simon O, Klebensberger J, Graf N, Rosche B, Altenbuchner J, Pfannstiel J,**  
498 **Huber A, Hauer B.** 2012. Ethylene glycol metabolism by *Pseudomonas putida*. *Appl*  
499 *Environ Microbiol* **78**:8531–9 doi:10.1128/AEM.02062-12.
- 500 18. **Takeda K, Matsumura H, Ishida T, Samejima M, Igarashi K, Nakamura N, Ohno H.** 2013.  
501 The two-step electrochemical oxidation of alcohols using a novel recombinant PQQ  
502 alcohol dehydrogenase as a catalyst for a bioanode. *Bioelectrochemistry* **94**:75–78  
503 doi:10.1016/j.bioelechem.2013.08.001.
- 504 19. **Simon O, Klebensberger J, Mükschel B, Klaiber I, Graf N, Altenbuchner J, Huber A, Hauer**  
505 **B, Pfannstiel J.** 2015. Analysis of the molecular response of *Pseudomonas putida* KT2440  
506 to the next-generation biofuel n-butanol. *J Proteomics* **122**:11–25  
507 doi:10.1016/j.jprot.2015.03.022.
- 508 20. **Kay CWM, Mennenga B, Görisch H, Bittl R.** 2006. Substrate binding in quinoprotein  
509 ethanol dehydrogenase from *Pseudomonas aeruginosa* studied by electron-nuclear  
510 double resonance. *Proc Natl Acad Sci U S A* **103**:5267–5272

- 511 doi:10.1073/pnas.0509667103.
- 512 21. **Mennenga B, Kay CWM, Görisch H.** 2009. Quinoprotein ethanol dehydrogenase from  
513 *Pseudomonas aeruginosa*: the unusual disulfide ring formed by adjacent cysteine  
514 residues is essential for efficient electron transfer to cytochrome c550. Arch Microbiol  
515 **191**:361–7 doi:10.1007/s00203-009-0460-4.
- 516 22. **Kay CWM, Mennenga B, Görisch H, Bittl R.** 2006. Structure of the pyrroloquinoline  
517 quinone radical in quinoprotein ethanol dehydrogenase. J Biol Chem **281**:1470–6  
518 doi:10.1074/jbc.M511132200.
- 519 23. **Keitel T, Diehl A, Knaute T, Stezowski JJ, Höhne W, Görisch H.** 2000. X-ray structure of  
520 the quinoprotein ethanol dehydrogenase from *Pseudomonas aeruginosa*: basis of  
521 substrate specificity. J Mol Biol **297**:961–974 doi:10.1006/jmbi.2000.3603.
- 522 24. **Chattopadhyay A, Förster-Fromme K, Jendrossek D.** 2010. PQQ-dependent alcohol  
523 dehydrogenase (QEDH) of *Pseudomonas aeruginosa* is involved in catabolism of acyclic  
524 terpenes. J Basic Microbiol **50**:119–24 doi:10.1002/jobm.200900178.
- 525 25. **Williams PA, Coates L, Mohammed F, Gill R, Erskine PT, Coker A, Wood SP, Anthony C,  
526 Cooper JB.** 2005. The atomic resolution structure of methanol dehydrogenase from  
527 *Methylobacterium extorquens*. Acta Crystallogr Sect D Biol Crystallogr **61**:75–79  
528 doi:10.1107/S0907444904026964.
- 529 26. **Chistoserdova L, Lidstrom ME.** 1997. Molecular and mutational analysis of a DNA region  
530 separating two methylotrophy gene clusters in *Methylobacterium extorquens* AM1.  
531 Microbiology **143**:1729–1736 doi:10.1099/00221287-143-5-1729.

- 532 27. **Richardson IW, Anthony C.** 1992. Characterization of mutant forms of the quinoprotein  
533 methanol dehydrogenase lacking an essential calcium ion. *Biochem J* **287**:709–715  
534 doi:10.1042/bj2870709.
- 535 28. **Nakagawa T, Mitsui R, Tani A, Sasa K, Tashiro S, Iwama T, Hayakawa T, Kawai K.** 2012. A  
536 Catalytic Role of XoxF1 as La<sup>3+</sup>-Dependent Methanol Dehydrogenase in *Methylobacterium*  
537 *extorquens* Strain AM1. *PLoS One* **7**:e50480 doi:10.1371/journal.pone.0050480.
- 538 29. **Hibi Y, Asai K, Arafuka H, Hamajima M, Iwama T, Kawai K.** 2011. Molecular structure of  
539 La<sup>3+</sup>-induced methanol dehydrogenase-like protein in *Methylobacterium radiotolerans*. *J*  
540 *Biosci Bioeng* **111**:547–549 doi:10.1016/j.jbiosc.2010.12.017.
- 541 30. **Fitriyanto NA, Fushimi M, Matsunaga M, Pertiwinigrum A, Iwama T, Kawai K.** 2011.  
542 Molecular structure and gene analysis of Ce<sup>3+</sup>-induced methanol dehydrogenase of  
543 *Bradyrhizobium sp.* MAFF211645. *J Biosci Bioeng* **111**:613–617  
544 doi:10.1016/j.jbiosc.2011.01.015.
- 545 31. **Wu ML, Wessels JCT, Pol A, Op den Camp HJM, Jetten MSM, van Niftrik L.** 2015. XoxF-  
546 type methanol dehydrogenase from the anaerobic methanotroph “*Candidatus*  
547 *Methylomirabilis oxyfera*”. *Appl Environ Microbiol* **81**:1442–51 doi:10.1128/AEM.03292-  
548 14.
- 549 32. **Chu F, Lidstrom ME.** 2016. XoxF acts as the predominant methanol dehydrogenase in the  
550 type I methanotroph *Methylomicrobium buryatense*. *J Bacteriol* **198**:JB.00959-15  
551 doi:10.1128/JB.00959-15.
- 552 33. **Pol A, Barends TRM, Dietl A, Khadem AF, Eygensteyn J, Jetten MSM, Op den Camp HJM.**

- 553 2014. Rare earth metals are essential for methanotrophic life in volcanic mudpots.  
554 Environ Microbiol **16**:255–264 doi:10.1111/1462-2920.12249.
- 555 34. **Taubert M, Grob C, Howat AM, Burns OJ, Dixon JL, Chen Y, Murrell JC.** 2015. XoxF  
556 encoding an alternative methanol dehydrogenase is widespread in coastal marine  
557 environments. Environ Microbiol **17**:3937–3948 doi:10.1111/1462-2920.12896.
- 558 35. **Skovran E, Martinez-Gomez NC.** 2015. Just add lanthanides. Science **348**:862–863  
559 doi:10.1126/science.aaa9091.
- 560 36. **Martinez-Gomez NC, Vu HN, Skovran E.** 2016. Lanthanide Chemistry: From Coordination  
561 in Chemical Complexes Shaping Our Technology to Coordination in Enzymes Shaping  
562 Bacterial Metabolism. Inorg Chem **55**:10083–10089 doi:10.1021/acs.inorgchem.6b00919.
- 563 37. **Nikel PI, Martínez-García E, de Lorenzo V.** 2014. Biotechnological domestication of  
564 pseudomonads using synthetic biology. Nat Rev Microbiol **12**:368–79  
565 doi:10.1038/nrmicro3253.
- 566 38. **Loeschcke A, Thies S.** 2015. *Pseudomonas putida*—a versatile host for the production of  
567 natural products. Appl Microbiol Biotechnol **99**:6197–6214 doi:10.1007/s00253-015-  
568 6745-4.
- 569 39. **Nikel PI, Chavarría M, Danchin A, de Lorenzo V.** 2016. From dirt to industrial  
570 applications: *Pseudomonas putida* as a Synthetic Biology chassis for hosting harsh  
571 biochemical reactions. Curr Opin Chem Biol **34**:20–29 doi:10.1016/j.cbpa.2016.05.011.
- 572 40. **Poblete-Castro I, Becker J, Dohnt K, dos Santos VM, Wittmann C.** 2012. Industrial

- 573 biotechnology of *Pseudomonas putida* and related species. Appl Microbiol Biotechnol  
574 **93**:2279–2290 doi:10.1007/s00253-012-3928-0.
- 575 41. **Vu HN, Subuyuj GA, Vijayakumar S, Good NM, Martinez-Gomez NC, Skovran E.** 2016.  
576 Lanthanide-Dependent Regulation of Methanol Oxidation Systems in *Methylobacterium*  
577 *extorquens* AM1 and Their Contribution to Methanol Growth. J Bacteriol **198**:JB.00937-15  
578 doi:10.1128/JB.00937-15.
- 579 42. **Farhan Ul Haque M, Kalidass B, Bandow N, Turpin EA, DiSpirito AA, Semrau JD.** 2015.  
580 Cerium Regulates Expression of Alternative Methanol Dehydrogenases in *Methylosinus*  
581 *trichosporium* OB3b. Appl Environ Microbiol **81**:7546–7552 doi:10.1128/AEM.02542-15.
- 582 43. **Chu F, Beck DAC, Lidstrom ME.** 2016. MxaY regulates the lanthanide-mediated methanol  
583 dehydrogenase switch in *Methylomicrobium buryatense*. PeerJ **4**:e2435  
584 doi:10.7717/peerj.2435.
- 585 44. **Skovran E, Palmer AD, Rountree AM, Good NM, Lidstrom ME.** 2011. XoxF Is Required for  
586 Expression of Methanol Dehydrogenase in *Methylobacterium extorquens* AM1. J Bacteriol  
587 **193**:6032–6038 doi:10.1128/JB.05367-11.
- 588 45. **Shannon RD.** 1976. Revised effective ionic radii and systematic studies of interatomic  
589 distances in halides and chalcogenides. Acta Crystallogr Sect A **32**:751–767  
590 doi:10.1107/S0567739476001551.
- 591 46. **Bogart J a, Lewis AJ, Scheluter EJ.** 2015. DFT study of the active site of the XoxF-type  
592 natural, cerium-dependent methanol dehydrogenase enzyme. Chemistry **21**:1743–8  
593 doi:10.1002/chem.201405159.

- 594 47. **Goodwin MG, Anthony C.** 1996. Characterization of a novel methanol dehydrogenase  
595 containing a Ba<sup>2+</sup> ion at the active site. *Biochem J* **318**:673–679 doi:10.1042/bj3180673.
- 596 48. **Wagner A.** 2005. Distributed robustness versus redundancy as causes of mutational  
597 robustness. *BioEssays* **27**:176–188 doi:10.1002/bies.20170.
- 598 49. **Arias S, Olivera ER, Arcos M, Naharro G, Luengo JM.** 2008. Genetic analyses and  
599 molecular characterization of the pathways involved in the conversion of 2-  
600 phenylethylamine and 2-phenylethanol into phenylacetic acid in *Pseudomonas putida* U.  
601 *Environ Microbiol* **10**:413–432 doi:10.1111/j.1462-2920.2007.01464.x.
- 602 50. **Vekeman B, Speth D, Wille J, Cremers G, De Vos P, Op den Camp HJM, Heylen K.** 2016.  
603 Genome Characteristics of Two Novel Type I Methanotrophs Enriched from North Sea  
604 Sediments Containing Exclusively a Lanthanide-Dependent XoxF5-Type Methanol  
605 Dehydrogenase. *Microb Ecol* **72**:503–509 doi:10.1007/s00248-016-0808-7.
- 606 51. **Markert B.** 1987. The pattern of distribution of lanthanide elements in soils and plants.  
607 *Phytochemistry* **26**:3167–3170 doi:10.1016/S0031-9422(00)82463-2.
- 608 52. **Carpenter D, Boutin C, Allison JE, Parsons JL, Ellis DM.** 2015. Uptake and Effects of Six  
609 Rare Earth Elements (REEs) on Selected Native and Crop Species Growing in  
610 Contaminated Soils. *PLoS One* **10**:e0129936 doi:10.1371/journal.pone.0129936.
- 611 53. **Aubert D, Stille P, Probst A, Gauthier-lafaye F, Pourcelot L, Del nero M.** 2002.  
612 Characterization and migration of atmospheric REE in soils and surface waters. *Geochim*  
613 *Cosmochim Acta* **66**:3339–3350 doi:10.1016/S0016-7037(02)00913-4.

- 614 54. **Kabata-Pendias A, Mukherjee AB.** 2007. Trace Elements from Soil to Human. Springer  
615 Berlin Heidelberg, Berlin, Heidelberg doi:10.1007/978-3-540-32714-1.
- 616 55. **Estrela S, Brown SP.** 2013. Metabolic and demographic feedbacks shape the emergent  
617 spatial structure and function of microbial communities. PLoS Comput Biol **9**:e1003398  
618 doi:10.1371/journal.pcbi.1003398.
- 619 56. **Zelezniak A, Andrejev S, Ponomarova O, Mende DR, Bork P, Patil KR.** 2015. Metabolic  
620 dependencies drive species co-occurrence in diverse microbial communities. Proc Natl  
621 Acad Sci **112**:6449–6454 doi:10.1073/pnas.1421834112.
- 622 57. **LaSarre B, McCully AL, Lennon JT, McKinlay JB.** 2017. Microbial mutualism dynamics  
623 governed by dose-dependent toxicity of cross-fed nutrients. ISME J **11**:337–348  
624 doi:10.1038/ismej.2016.141.
- 625 58. **Schink B.** 1997. Energetics of syntrophic cooperation in methanogenic degradation.  
626 Microbiol Mol Biol Rev **61**:262–80 doi:1092-2172/97/\$04.0010.
- 627 59. **Krause SMB, Johnson T, Samadhi Karunaratne Y, Fu Y, Beck DAC, Chistoserdova L,**  
628 **Lidstrom ME.** 2017. Lanthanide-dependent cross-feeding of methane-derived carbon is  
629 linked by microbial community interactions. Proc Natl Acad Sci **114**:358–363  
630 doi:10.1073/pnas.1619871114.
- 631 60. **Das N, Das D.** 2013. Recovery of rare earth metals through biosorption: An overview. J  
632 Rare Earths **31**:933–943 doi:10.1016/S1002-0721(13)60009-5.
- 633 61. **Gu W, Farhan Ul Haque M, DiSpirito AA, Semrau JD.** 2016. Uptake and effect of rare

- 634 earth elements on gene expression in *Methylosinus trichosporium* OB3b. FEMS Microbiol  
635 Lett **363**:fnw129 doi:10.1093/femsle/fnw129.
- 636 62. **Emmanuel EC, Ananthi T, Anandkumar B, Maruthamuthu S.** 2012. Accumulation of rare  
637 earth elements by siderophore-forming *Arthrobacter luteolus* isolated from rare earth  
638 environment of Chavara, India. J Biosci **37**:25–31 doi:10.1007/s12038-011-9173-3.
- 639 63. **Challaraj Emmanuel ES, Vignesh V, Anandkumar B, Maruthamuthu S.** 2011.  
640 Bioaccumulation of cerium and neodymium by *Bacillus cereus* isolated from rare earth  
641 environments of Chavara and Manavalakurichi, India. Indian J Microbiol **51**:488–495  
642 doi:10.1007/s12088-011-0111-8.
- 643 64. **Barmettler F, Castelberg C, Fabbri C, Brandl H.** 2016. Microbial mobilization of rare earth  
644 elements (REE) from mineral solids—A mini review. AIMS Microbiol **2**:190–204  
645 doi:10.3934/microbiol.2016.2.190.
- 646 65. **Ene CD, Ruta LL, Nicolau I, Popa C V., Iordache V, Neagoie AD, Farcasanu IC.** 2015.  
647 Interaction between lanthanide ions and *Saccharomyces cerevisiae* cells. JBIC J Biol Inorg  
648 Chem **20**:1097–1107 doi:10.1007/s00775-015-1291-1.
- 649 66. **Maniatis T, Fritsch EF (Edward F., Sambrook J, Laboratory CSH.** 1982. Molecular Cloning :  
650 A Laboratory Manual. Cold Spring Harbor, N.Y. Cold Spring Harbor Laboratory.
- 651 67. **Delaney NF, Kaczmarek ME, Ward LM, Swanson PK, Lee M-C, Marx CJ.** 2013.  
652 Development of an Optimized Medium, Strain and High-Throughput Culturing Methods  
653 for *Methylobacterium extorquens*. PLoS One **8**:e62957  
654 doi:10.1371/journal.pone.0062957.



- 655 68. **Anthony C, Zatman LJ.** 1964. The microbial oxidation of methanol. 2. The methanol-  
656 oxidizing enzyme of *Pseudomonas sp.* M 27. *Biochem J* **92**:614–21.
- 657 69. **Biasini M, Bienert S, Waterhouse A, Arnold K, Studer G, Schmidt T, Kiefer F, Cassarino**  
658 **TG, Bertoni M, Bordoli L, Schwede T.** 2014. SWISS-MODEL: modelling protein tertiary and  
659 quaternary structure using evolutionary information. *Nucleic Acids Res* **42**:W252--W258  
660 doi:10.1093/nar/gku340.
- 661 70. **Schrodinger LLC.** 2015. The PyMOL Molecular Graphics System, Version 1.8.  
662

663 **FIGURES**

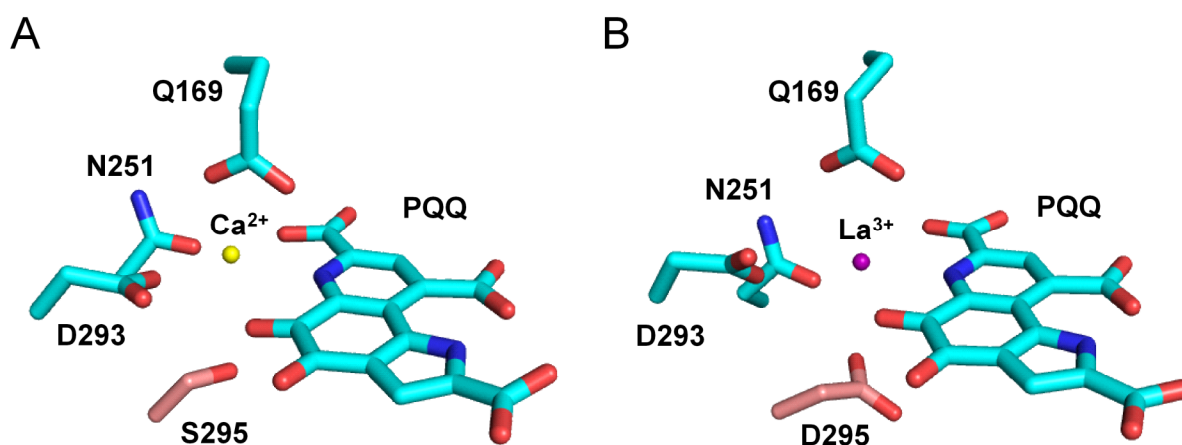

665 **FIG 1:** Homology models of PedE (**A**) (GI: 26989393) and PedH (**B**) (GI: 26989398) generated  
666 with SWISS-MODEL based on the crystal structure of ExaA from *Pseudomonas aeruginosa* (PDB:  
667 1FLG) using Pymol (70). The catalytic cation (*yellow or violet sphere*) coordinating amino acids  
668 and the PQQ cofactor are shown as sticks using an element color code (C = cyan, O = red, N =  
669 blue). The amino acid position 295 in PedE and PedH is highlighted by using a different color  
670 code (C = light red).

671

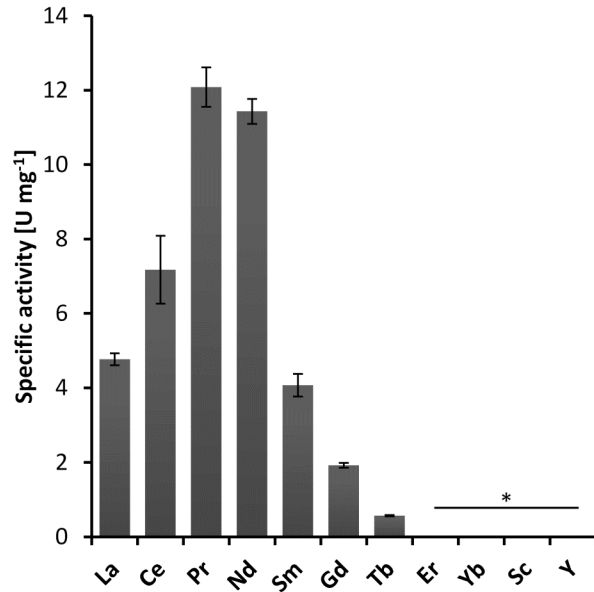

672

673 **Fig 2:** Specific activities of PedH in the presence of 1 μM of various rare earth metal ions with  
 674 10 mM ethanol as substrate. Activities below detection limit are indicated (\*). Data are  
 675 presented as the mean value of three replicates and error bars represent the corresponding  
 676 standard deviation.

677

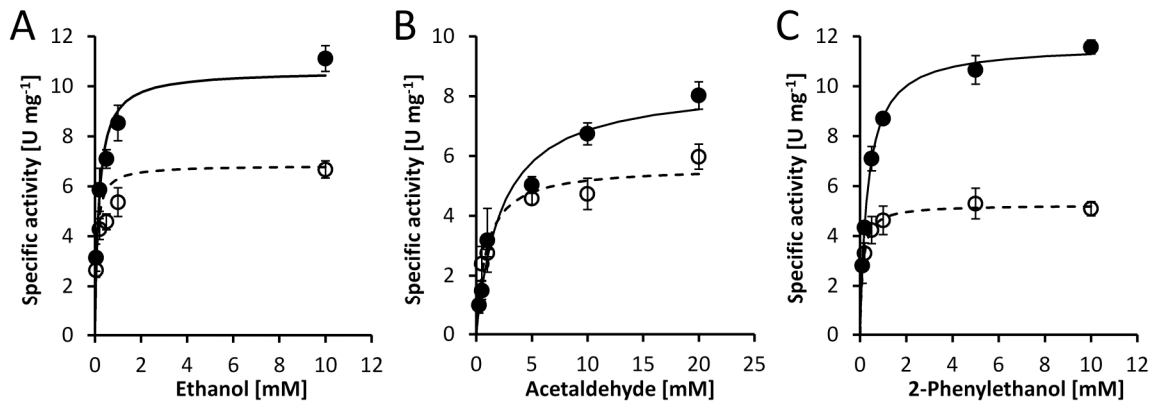

D

| Substrate       | $V_{max}$ [U mg <sup>-1</sup> ] | $K_M$ [μM] | $k_{cat}/K_M$ [mM s <sup>-1</sup> ] |
|-----------------|---------------------------------|------------|-------------------------------------|
| Ethanol         | 6.1 ± 0.3                       | 85 ± 18    | 81 ± 18                             |
| Acetaldehyde    | 5.6 ± 0.2                       | 899 ± 155  | 7.0 ± 1.2                           |
| 2-Phenylethanol | 5.2 ± 0.2                       | 115 ± 22   | 51 ± 10                             |

E

| Substrate       | $V_{max}$ [U mg <sup>-1</sup> ] | $K_M$ [μM] | $k_{cat}/K_M$ [mM s <sup>-1</sup> ] |
|-----------------|---------------------------------|------------|-------------------------------------|
| Ethanol         | 10.6 ± 0.4                      | 177 ± 31   | 66 ± 12                             |
| Acetaldehyde    | 8.4 ± 0.5                       | 2261 ± 457 | 4.1 ± 0.8                           |
| 2-Phenylethanol | 11.8 ± 0.2                      | 329 ± 22   | 38 ± 3                              |

678

679 **FIG 3:** Kinetic parameter determination. **A-C)** Michaelis-Menten plot showing specific enzyme  
680 activities of PedE (*black circles*) and PedH (*white circles*) over a varying concentration of ethanol  
681 (**A**), acetaldehyde (**B**), and 2-phenylethanol (**C**). For PedE, 1 mM of CaCl<sub>2</sub> and 50 μM PQQ was  
682 used, while for PedH, 1 μM PrCl<sub>3</sub> and 1 μM PQQ was used in the reaction mixture. The data are  
683 given as mean value of triplicate measurements with error bars representing the standard  
684 deviation. Maximum velocity ( $V_{max}$ ), substrate affinity ( $K_M$ ) and the catalytic efficiency ( $k_{cat}/K_M$ ,  
685 where  $k_{cat}$  is the turnover frequency per cofactor molecule) of PedE (**D**) and PedH (**E**) for different  
686 substrates are derived from **A-C** using nonlinear regression to a Michaelis-Menten model  
687 (*continuous lines* for PedH and *dashed lines* for PedE). Kinetic constants are represented as best  
688 fit values ± standard error.

689

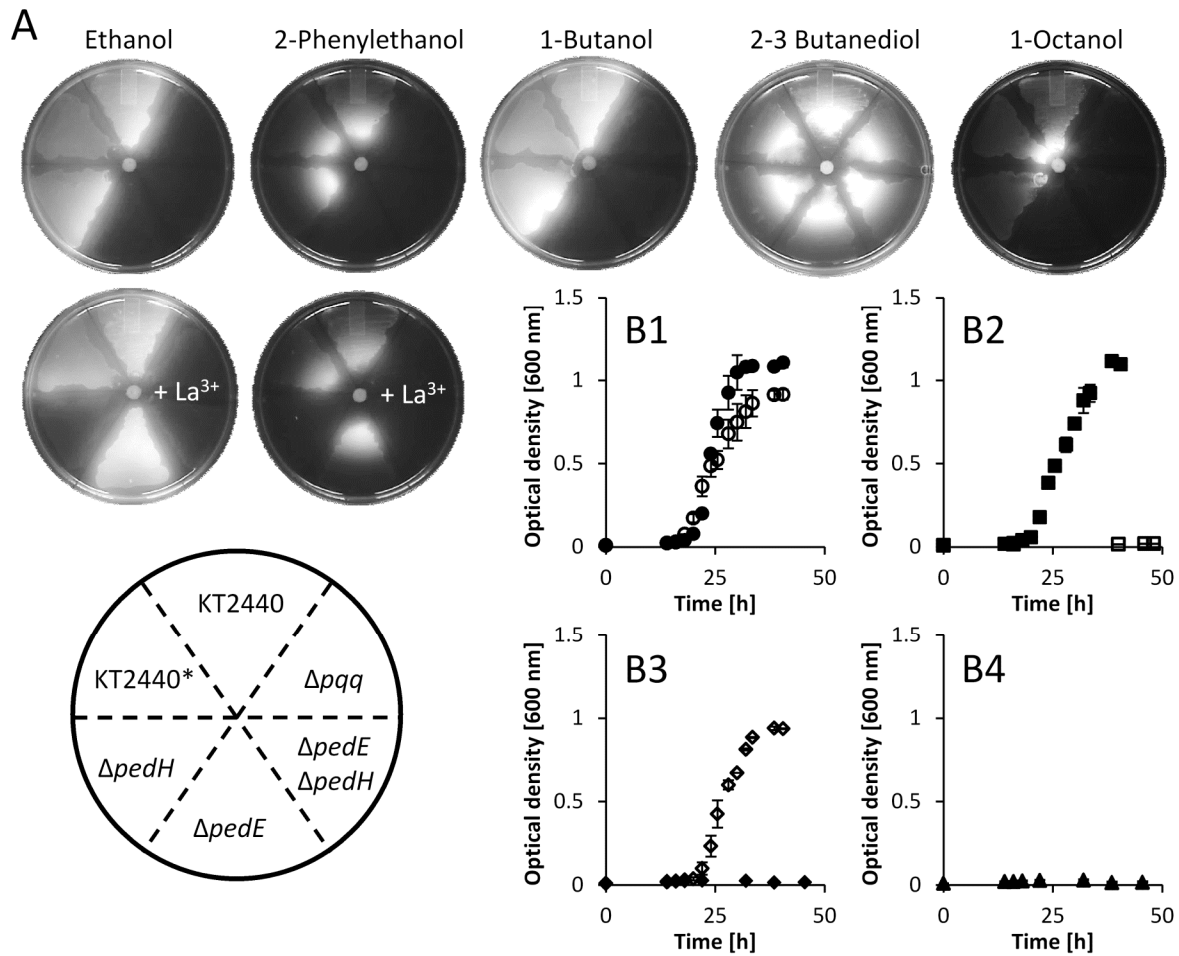

690

691 **FIG 4: A)** Growth with various substrates (10  $\mu$ L drop of a 1:1 mix with DMSO) on M9 agar  
 692 plates. Growth was quantified with a digital imaging system after 48 h using combined white  
 693 light and UV illumination (ex. 254 nm). All pictures were sized, isolated from the background,  
 694 and corrected for sharpness (+ 50%), brightness (+ 20%), and contrast (+ 40%). **B1-4)** Growth of  
 695 KT2440\* ( $\Delta$ *upp* strain used as the parental strain for knockout mutants; **B1**, circles),  $\Delta$ *pedE* (**B2**,  
 696 diamonds),  $\Delta$ *pedH* (**B3**, squares), and  $\Delta$ *pedE* $\Delta$ *pedH* (**B4**, triangles) in M9 medium with 5 mM 2-  
 697 phenylethanol in the absence (black symbols) or presence of 20  $\mu$ M La<sup>3+</sup> (open symbols). Growth  
 698 was performed in 25 mL (125 mL plastic Erlenmeyer) at 30°C and 180 rpm shaking (Multifors)  
 699 and quantified by optical density measurements at 600 nm. Data represent the mean of two

700 individual cultures with error bars representing the corresponding range. All error bars are  
701 depicted but might not be visible due to the size of the corresponding symbol used for the mean  
702 value.

703

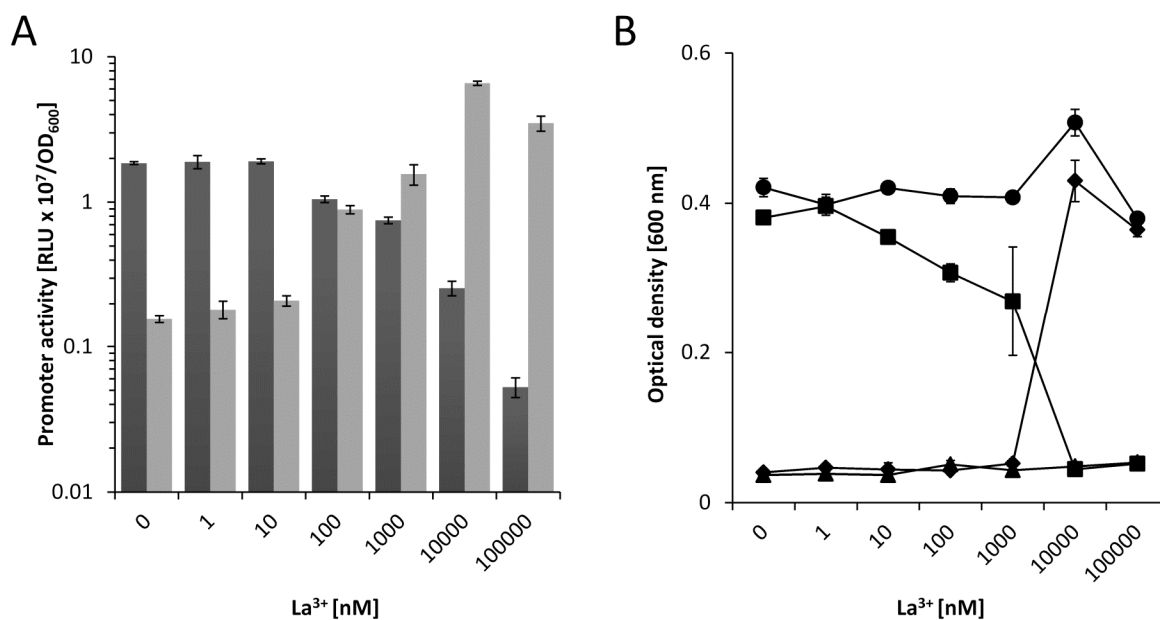

704

705 **FIG 5: A)** Activities of the *pedE* (dark grey bars) and *pedH* (light grey bars) promoters in strain  
706 KT2440\* during incubation in liquid M9 medium (A) supplemented with 1 mM of 2-  
707 phenylethanol in the presence of varying concentrations of La<sup>3+</sup>. Promoter activities are  
708 presented as relative light units (RLU × 10<sup>7</sup>) normalized to OD<sub>600</sub>. **B)** Growth of KT2440\* (black  
709 circles), ΔuppΔpedE (black diamonds), ΔuppΔpedH (black squares) and ΔuppΔpedEΔpedH (black  
710 triangles) in liquid M9 medium with 5 mM of 2-phenylethanol in the presence of different  
711 concentrations of La<sup>3+</sup>. Growth was determined as the optical density at 600 nm after  
712 incubation at 30°C for 24 h. Data are presented as mean values from biological triplicates and  
713 error bars represent the corresponding standard deviation.

714

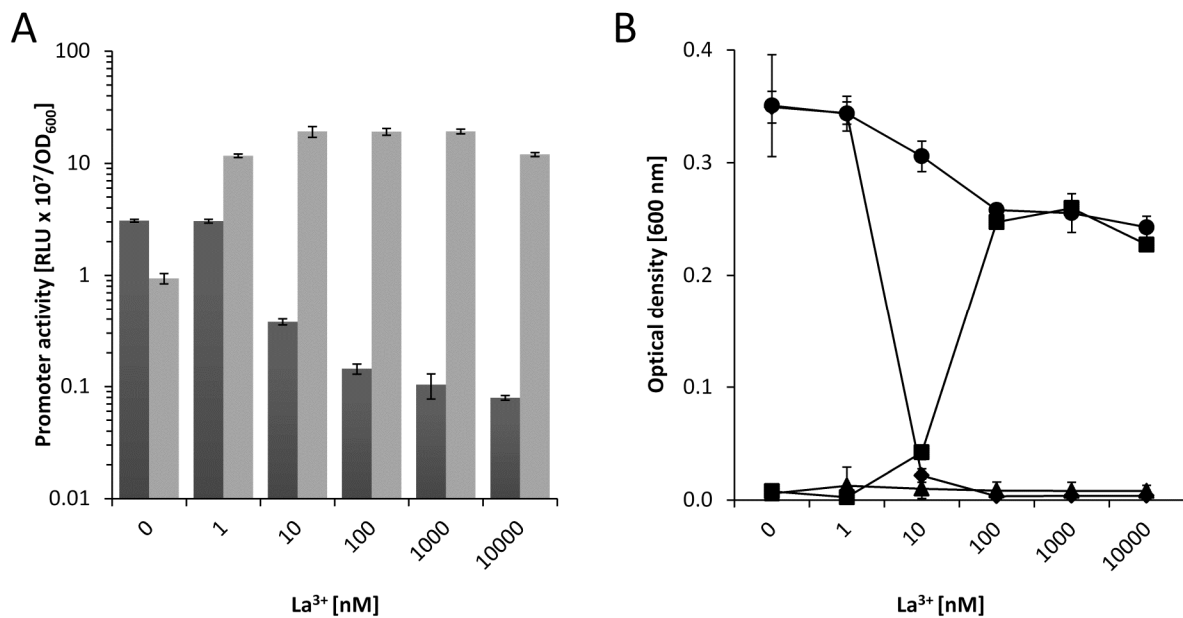

715

716 **FIG 6: A)** Activities of the *pedE* (dark grey bars) and *pedH* (light grey bars) promoters in strain  
717 KT2440\* during incubation in liquid MP medium (A) supplemented with 1 mM of 2-  
718 phenylethanol in the presence of varying concentrations of La<sup>3+</sup>. Promoter activities are  
719 presented as relative light units (RLU × 10<sup>7</sup>) normalized to OD<sub>600</sub>. **B)** Growth of KT2440\* (black  
720 circles),  $\Delta upp \Delta pedE$  (black diamonds),  $\Delta upp \Delta pedH$  (black squares) and  $\Delta upp \Delta pedE \Delta pedH$  (black  
721 triangles) in liquid MP medium with 5 mM of 2-phenylethanol in the presence of different La<sup>3+</sup>  
722 concentrations. Growth was determined as the optical density at 600 nm after incubation at  
723 30°C for 24 h. Data are presented as the mean values from biological triplicates and error bars  
724 represent the corresponding standard deviation.

725

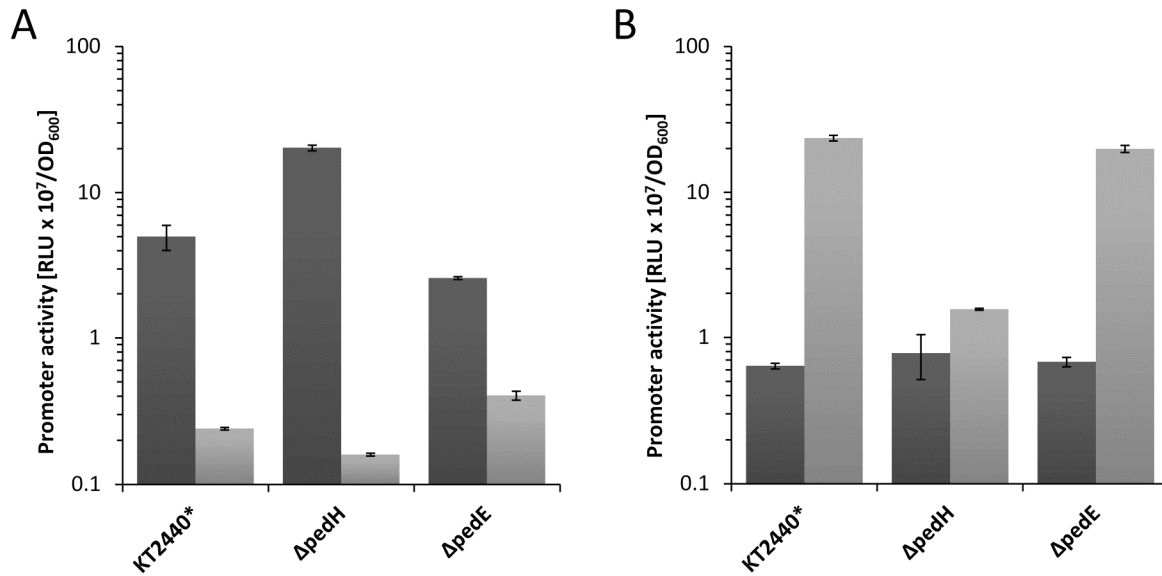

726

727 **FIG 7:** Activities of the *pedE* (A) and *pedH* (B) promoters in strains KT2440\* ( $\Delta upp$  strain used as  
728 the parental strain for knockout mutants),  $\Delta pedE$ ,  $\Delta pedH$  and  $\Delta pedE\Delta pedH$  in liquid MP medium  
729 with 1 mM of 2-phenylethanol in the absence (dark grey bars) or presence of 10 nM La<sup>3+</sup> (light  
730 grey bars). Promoter activities are presented as relative light units (RLU  $\times 10^7$ ) normalized to  
731 OD<sub>600</sub>. Data are presented as the mean values from biological triplicates and error bars  
732 represent the corresponding standard deviation. The promoter activities for each strain in the  
733 presence and absence of lanthanides were statistically analyzed (two-tailed *t*-test;  $\alpha = 0.05$ ;  $N =$   
734 3; GraphPad Prism, version 7.03) and found to be significantly different ( $P < 0.01$ ).



735 **TABLES**

736 **Table 1:** Specific activities of PedE and PedH with various alcohols and aldehydes. Data are  
737 presented as the mean value of three independent measurements with the corresponding  
738 standard deviation. 10 mM of substrate was used in H<sub>2</sub>O if not indicated otherwise.

| Substrate                     | Specific activity [U mg <sup>-1</sup> ] |                    |
|-------------------------------|-----------------------------------------|--------------------|
|                               | PedE                                    | PedH               |
| Methanol                      | 0.61 ± 0.10                             | 0.80 ± 0.05        |
| Ethanol                       | 6.7 ± 0.9                               | 11.0 ± 0.3         |
| Ethanolamine                  | 0.55 ± 0.09                             | 1.6 ± 0.2          |
| 1-Butanol                     | 5.8 ± 0.1                               | 11.5 ± 0.7         |
| 2-Butanol                     | 4.4 ± 0.7                               | 7.6 ± 0.4          |
| 2,3-Butanediol                | 0.39 ± 0.03                             | 0.78 ± 0.04        |
| 1-Hexanol                     | 5.2 ± 0.1                               | 10.4 ± 1.1         |
| 1-Octanol <sup>a</sup>        | 3.5 ± 0.2                               | 4.7 ± 0.7          |
| 2-Phenylethanol               | 6.7 ± 1.1                               | 10.2 ± 1.4         |
| Acetaldehyde                  | 4.7 ± 0.5                               | 6.7 ± 0.4          |
| Butyraldehyde                 | 6.1 ± 0.4                               | 10.3 ± 0.6         |
| Hexanal <sup>a</sup>          | 3.8 ± 0.1                               | 6.2 ± 0.3          |
| Octanal <sup>a</sup>          | 1.9 ± 0.2                               | 3.6 ± 0.6          |
| Cinnamyl alcohol <sup>a</sup> | 2.4 ± 0.1                               | 3.9 ± 0.1          |
| Cinnamaldehyde <sup>b</sup>   | n. d. <sup>c</sup>                      | n. d. <sup>c</sup> |
| Farnesol <sup>b</sup>         | 2.0 ± 0.3                               | 3.8 ± 0.5          |

739 <sup>a</sup> 10 mM substrate in DMSO.

740 <sup>b</sup> 500 μM substrate in DMSO.

741 <sup>c</sup> Activity below detection limit.
